# Supplementary material for: Safety and Feasibility of Intravenous Administration of Autologous Stem Cells from Human Exfoliated Deciduous Teeth (SHED) in Children with Cerebral Palsy: A First-in-Human Phase I Clinical Trial (Interim Analysis)
Source: Research Square preprint supplement (doi:10.21203/rs.3.rs-8013498/v1), 2025-11-14
Supplement: Supplementary file 1 [file bc1fa5411204c01b4771516f.docx]

**Supplementary Table 1. Expanded Laboratory Data Before and After SHED Infusion**

Data represent measured values at each time point. Data for coagulation factors (PT, AT III) and urinalysis (UP, UB, UG, UpH) were collected up to Week 2 post-infusion.

RBC (×106/μL)

| Case ID | SCR | Pre treatment | Day 1 | Day 3 | Week 2 | Week 4 |
| --- | --- | --- | --- | --- | --- | --- |
| 1 | 4.72 | 4.63 | 4.53 | 4.87 | 4.84 | 4.79 |
| 2 | 4.58 | 4.39 | 4.44 | 4.41 | 4.72 | 4.64 |
| 3 | 4.28 | 4.19 | 4.29 | 4.24 | 4.04 | 4.37 |

Ht (%)

| Case ID | SCR | Pre treatment | Day 1 | Day 3 | Week 2 | Week 4 |
| --- | --- | --- | --- | --- | --- | --- |
| 1 | 39.8 | 39.0 | 38.1 | 41.8 | 41.4 | 40.6 |
| 2 | 37.8 | 36.9 | 36.8 | 36.6 | 39.2 | 39.1 |
| 3 | 35.8 | 35.5 | 37.0 | 36.2 | 35.1 | 37.5 |

BUN (mg/dL)

| Case ID | SCR | Pre treatment | Day 1 | Day 3 | Week 2 | Week 4 |
| --- | --- | --- | --- | --- | --- | --- |
| 1 | 13.4 | 15.5 | 13.0 | 13.3 | 14.5 | 14.1 |
| 2 | 15.7 | 17.4 | 10.2 | 9.2 | 18.1 | 12.9 |
| 3 | 17.3 | 11.3 | 15.6 | 13.3 | 11.9 | 12.2 |

LDH (U/L)

| Case ID | SCR | Pre treatment | Day 1 | Day 3 | Week 2 | Week 4 |
| --- | --- | --- | --- | --- | --- | --- |
| 1 | 278 | 252 | 216 | 218 | 214 | 250 |
| 2 | 283 | 216 | 293 | 249 | 246 | 284 |
| 3 | 226 | 260 | 318 | 294 | 316 | 286 |

AST (U/L)

| Case ID | SCR | Pre treatment | Day 1 | Day 3 | Week 2 | Week 4 |
| --- | --- | --- | --- | --- | --- | --- |
| 1 | 32 | 31 | 25 | 24 | 25 | 26 |
| 2 | 21 | 17 | 26 | 21 | 21 | 21 |
| 3 | 19 | 25 | 25 | 25 | 26 | 27 |

ALT (U/L)

| Case ID | SCR | Pre treatment | Day 1 | Day 3 | Week 2 | Week 4 |
| --- | --- | --- | --- | --- | --- | --- |
| 1 | 16 | 19 | 14 | 12 | 13 | 14 |
| 2 | 13 | 10 | 12 | 11 | 14 | 12 |
| 3 | 9 | 11 | 11 | 12 | 11 | 14 |

ALP (U/L)

| Case ID | SCR | Pre treatment | Day 1 | Day 3 | Week 2 | Week 4 |
| --- | --- | --- | --- | --- | --- | --- |
| 1 | 212 | 227 | 212 | 231 | 215 | 168 |
| 2 | 214 | 217 | 212 | 211 | 220 | 220 |
| 3 | 211 | 264 | 246 | 246 | 224 | 264 |

γ-GTP (U/L)

| Case ID | SCR | Pre treatment | Day 1 | Day 3 | Week 2 | Week 4 |
| --- | --- | --- | --- | --- | --- | --- |
| 1 | 12 | 10 | 10 | 10 | 11 | 11 |
| 2 | 10 | 10 | 11 | 10 | 10 | 11 |
| 3 | 10 | 11 | 11 | 11 | 11 | 13 |

T-Bil (mg/dL)

| Case ID | SCR | Pre treatment | Day 1 | Day 3 | Week 2 | Week 4 |
| --- | --- | --- | --- | --- | --- | --- |
| 1 | 0.4 | 0.4 | 0.5 | 0.4 | 0.5 | 0.3 |
| 2 | 0.3 | 0.3 | 0.5 | 0.3 | 0.3 | 0.4 |
| 3 | 0.3 | 0.4 | 0.5 | 0.5 | 0.6 | 0.4 |

D-Bil (mg/dL)

| Case ID | SCR | Pre treatment | Day 1 | Day 3 | Week 2 | Week 4 |
| --- | --- | --- | --- | --- | --- | --- |
| 1 | 0.0 | 0.0 | 0.0 | 0.0 | 0.0 | 0.0 |
| 2 | 0.0 | 0.0 | 0.0 | 0.0 | 0.0 | 0.0 |
| 3 | 0.0 | 0.0 | 0.0 | 0.0 | 0.0 | 0.0 |

CK (U/L)

| Case ID | SCR | Pre treatment | Day 1 | Day 3 | Week 2 | Week 4 |
| --- | --- | --- | --- | --- | --- | --- |
| 1 | 261 | 170 | 147 | 166 | 200 | 103 |
| 2 | 155 | 130 | 207 | 159 | 134 | 145 |
| 3 | 236 | 374 | 244 | 241 | 300 | 311 |

Na (mmol/L)

| Case ID | SCR | Pre treatment | Day 1 | Day 3 | Week 2 | Week 4 |
| --- | --- | --- | --- | --- | --- | --- |
| 1 | 141 | 143 | 143 | 143 | 141 | 142 |
| 2 | 139 | 141 | 140 | 141 | 139 | 140 |
| 3 | 143 | 141 | 139 | 142 | 139 | 139 |

K (mmol/L)

| Case ID | SCR | Pre treatment | Day 1 | Day 3 | Week 2 | Week 4 |
| --- | --- | --- | --- | --- | --- | --- |
| 1 | 4.2 | 4.5 | 3.9 | 4.0 | 4.6 | 5.1 |
| 2 | 4.3 | 4.1 | 3.8 | 4.1 | 4.5 | 4.0 |
| 3 | 4 | 4.7 | 4.5 | 4.8 | 4.6 | 4.9 |

Ca (mg/dL)

| Case ID | SCR | Pre treatment | Day 1 | Day 3 | Week 2 | Week 4 |
| --- | --- | --- | --- | --- | --- | --- |
| 1 | 9.6 | 9.7 | 9.6 | 9.8 | 9.7 | 9.6 |
| 2 | 9.5 | 9.4 | 9.5 | 9.4 | 9.6 | 9.6 |
| 3 | 9.4 | 9.4 | 9.2 | 9.3 | 9.0 | 9.6 |

IP (mg/dL)

| Case ID | SCR | Pre treatment | Day 1 | Day 3 | Week 2 | Week 4 |
| --- | --- | --- | --- | --- | --- | --- |
| 1 | 4.9 | 5.1 | 4.4 | 4.9 | 4.9 | 4.9 |
| 2 | 4.6 | 4.7 | 4.4 | 4.4 | 5.0 | 4.6 |
| 3 | 5.0 | 4.9 | 4.7 | 4.8 | 4.6 | 4.9 |

FPG (mg/dL)

| Case ID | SCR | Pre treatment | Day 1 | Day 3 | Week 2 | Week 4 |
| --- | --- | --- | --- | --- | --- | --- |
| 1 | 107 | 112 | 110 | 97 | 102 | 105 |
| 2 | 95 | 97 | 88 | 95 | 99 | 88 |
| 3 | 85 | 96 | 93 | 87 | 89 | 89 |

PT (%)

| Case ID | SCR | Pre treatment | Day 1 | Day 3 | Week 2 |
| --- | --- | --- | --- | --- | --- |
| 1 | 102 | 107 | 92 | 104 | 100 |
| 2 | 96 | 99 | 88 | 99 | 101 |
| 3 | 93 | 84 | 91 | 107 | 87 |

AT Ⅲ (%)

| Case ID | SCR | Pre treatment | Day 1 | Day 3 | Week 2 |
| --- | --- | --- | --- | --- | --- |
| 1 | 120 | 132 | 115 | 121 | 116 |
| 2 | 147 | 119 | 115 | 116 | 122 |
| 3 | 109 | 101 | 107 | 125 | 101 |

UP

| Case ID | SCR | Pre treatment | Day 1 | Day 3 | Week 2 |
| --- | --- | --- | --- | --- | --- |
| 1 | Negative | ± | Negative | Negative | Negative |
| 2 | Negative | Negative | Negative | Negative | Negative |
| 3 | Negative | Negative | Negative | Negative | Negative |

UB

| Case ID | SCR | Pre treatment | Day 1 | Day 3 | Week 2 |
| --- | --- | --- | --- | --- | --- |
| 1 | Negative | Negative | Negative | Negative | Negative |
| 2 | Negative | Negative | Negative | Negative | Negative |
| 3 | Negative | Negative | Negative | Negative | Negative |

UG

| Case ID | SCR | Pre treatment | Day 1 | Day 3 | Week 2 |
| --- | --- | --- | --- | --- | --- |
| 1 | Negative | Negative | Negative | Negative | Negative |
| 2 | Negative | Negative | Negative | Negative | Negative |
| 3 | Negative | Negative | Negative | Negative | Negative |

UpH

| Case ID | SCR | Pre treatment | Day 1 | Day 3 | Week 2 |
| --- | --- | --- | --- | --- | --- |
| 1 | 7.0 | 6.5 | 6.0 | 5.5 | 7.0 |
| 2 | 7.5 | 7.0 | 8.5 | 8.0 | 7.5 |
| 3 | 7.5 | 8.0 | 7.5 | 7.5 | 8.0 |

SHED, Stem cells from human exfoliated deciduous teeth; SCR, Screening; RBC, Red blood cell count; Ht, Hematocrit; BUN, Blood urea nitrogen; LDH, Lactate dehydrogenase; AST, Aspartate aminotransferase; ALT, Alanine aminotransferase; ALP, Alkaline phosphatase; γ-GTP, Gamma-glutamyl transpeptidase; T-Bil, Total bilirubin; D-Bil, Direct bilirubin; CK, Creatine kinase; Na, Sodium; K, Potassium; Ca, Calcium; IP, Inorganic phosphorus; FPG, Fasting plasma glucose; PT, Prothrombin time; AT III, Antithrombin III; UP, Urine protein; UB, Urine blood; UG, Urine glucose; UpH, Urine pH
